# Supplementary material for: Frame-disrupting mutations elicit pre-mRNA accumulation independently of frame disruption
Source: PubMed Central journal article supplement — Nucleic Acids Res. 2009 Dec 9;38(5):1559–74. doi: 10.1093/nar/gkp1115 (PMC2836556; doi:10.1093/nar/gkp1115), 2009-12-09
Supplement: gkp1115_1.pdf [file gkp1115_1.pdf]

## Supplementary Figure Legends

Figure S1. NMUP is intron dependent. **(A)** Schematic diagram indicating how the intron-deleted construct was generated from construct A. The nonsense mutation ( $A^{N2}$  and  $\Delta A^{N2}$ ) and missense mutation ( $A^{M2}$  or  $\Delta A^{M2}$ ) were introduced into exon 6 at codon. **(B-D)** Quantification of RNase protection analysis performed on total cellular RNA (10  $\mu$ g) harvested from HeLa cells transiently transfected with the constructs shown. Probes 1, and 3 (panel **A**) were used to detect mature/IVS-A+ pre-mRNA and IVS-B+ pre-mRNA, respectively. Values were quantified from 3 or more independent experiments by the approach described in Figure 1. Error bars indicate standard error. **(E)** Splicing rate as measured by pre-mRNA-to-mRNA ratio, determined as in Figure 5E, using the values in panels **B-D**.

Figure S2. The NMUP substrate contains TCR introns IVS-A and -B, but not IVS-C or -D. **(A)** Schematic diagram showing construct A and the position of the nonsense and frameshift mutations in variant constructs  $A^{N1}$ ,  $A^{I1+}$ , and  $A^{N2}$  (see also Figure 1A). The position of the intron probes used for the Northern blot analysis in panel B is also indicated. **(B)** Northern blot analysis of total cellular RNA (10  $\mu$ g) isolated from HeLa cells stably transfected with constructs A,  $A^{N1}$ ,  $A^{I1+}$ , and  $A^{N2}$ . The schematics indicate the introns present in the pre-mRNAs in each band, based on band migration and their hybridization with the different probes. The bands corresponding to spliced IVS-A, -B, -C, and -D migrated at a position consistent with their expected sizes (~0.5, ~0.8, ~0.25, and ~0.1 nt, respectively). The transcripts denoted by the symbols  $\Delta$ ,  $\S$ , and \* are explained in Figure 3. The results shown are representative of two independent experiments.

Figure S3. TCR/TPI pre-mRNA has a long half-life. **(A)** mRNA half-life analysis of TCR/TPI pre-mRNA expressed from construct A (Figure 1B) transiently transfected into HeLa cells. The cells were cultured for 2 days after transfection and then incubated with the transcriptional inhibitor actinomycin D (8  $\mu$ g/ml) for the times indicated. RNase protection analysis was performed on 10  $\mu$ g total cellular RNA using probe 1 for IVS-A+ pre-mRNA, probe 3 for IVS-B+ pre-mRNA, and probe 4 for IVS-D+ pre-mRNA. Values were quantified as described in Figure 1; similar results were obtained in two independent transfection experiments. **(B)** mRNA half-life analysis of TCR/TPI pre-mRNA expressed from the *c-fos* promoter-driven construct shown (construct  $A^{fos}$ ) transiently transfected into NIH-3T3 cells. The cells were cultured for 1 day after transfection in serum-free conditions and then incubated with serum (the times indicated are 45 minutes post-serum addition, as serum-induced *c-fos* transcription ceases ~45 minutes after the addition of serum). RNase protection analysis was performed on 5  $\mu$ g total cellular RNA using probe 1 for IVS-A+ pre-mRNA and probe 3 for IVS-B+ pre-mRNA. Values were quantified as described in Figure 1; similar results were obtained in two independent transfection experiments. **(C)** Real-time PCR analysis of endogenous  $\beta$ -actin and *GAPDH* pre-mRNA half-lives determined using total cellular RNA from HeLa cells incubated with actinomycin D (8  $\mu$ g/ml) for the times indicated. Real-time PCR analysis was performed as previously described (63).

Figure S4. NMUP is not relieved by suppressor tRNAs. **(A)** Schematic indicating the location of the nonsense mutations in constructs  $A^{N1}$  and  $A^{N2}$ . **(B-D)** RNase protection analysis of total cellular RNA obtained from HeLa cells transiently co-transfected with the constructs shown in panel A and the nonsense codon-specific suppressor tRNAs indicated. Probes 1 and 3 were used to determine the levels of pre-mRNA harboring IVS-A+ and IVS-B+, respectively. Mature mRNA levels were determined using probe 1. Quantification was done as described in Figure 7: a  $\beta$ -globin expression construct was cotransfected into the cells to provide an internal control

for transfection efficiency ( $\beta$ -globin mRNA levels were assayed by RNase protection analysis in the same gel that assayed TCR/TPI mRNA levels). Similar results were obtained in two independent experiments.

Supplementary Figure S1

**A**

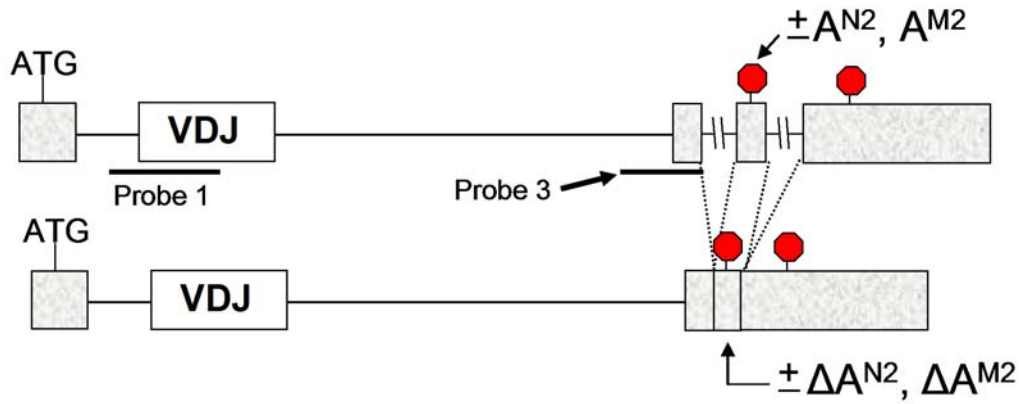

**B**

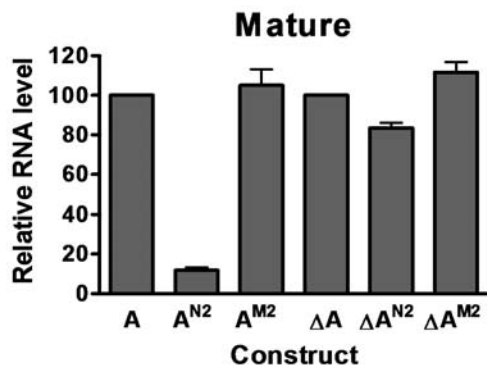

**C**

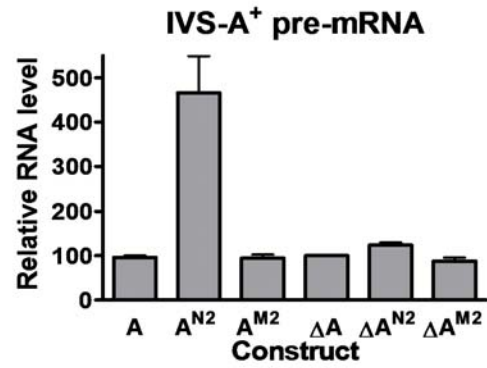

**D**

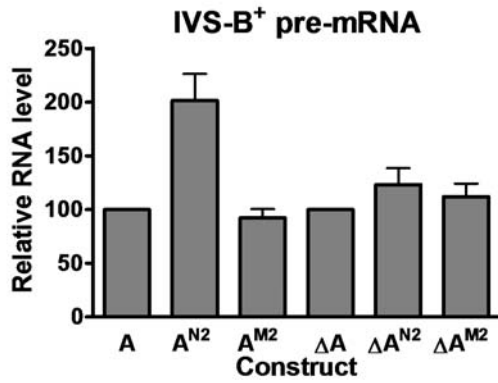

**E**

**IVS-A<sup>+</sup> pre-mRNA/mRNA ratio**

| A   | A <sup>M2</sup> | ΔA  | ΔA <sup>M2</sup> |
|-----|-----------------|-----|------------------|
| 1.0 | 0.9             | 1.0 | 0.8              |

**A**

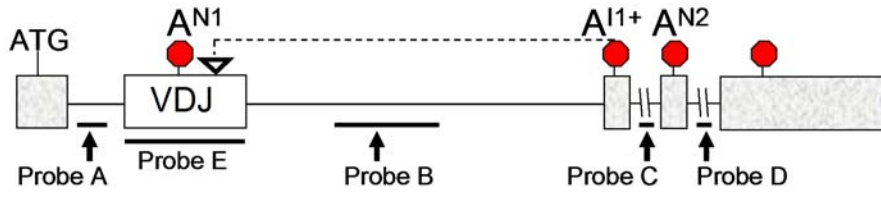

**B**

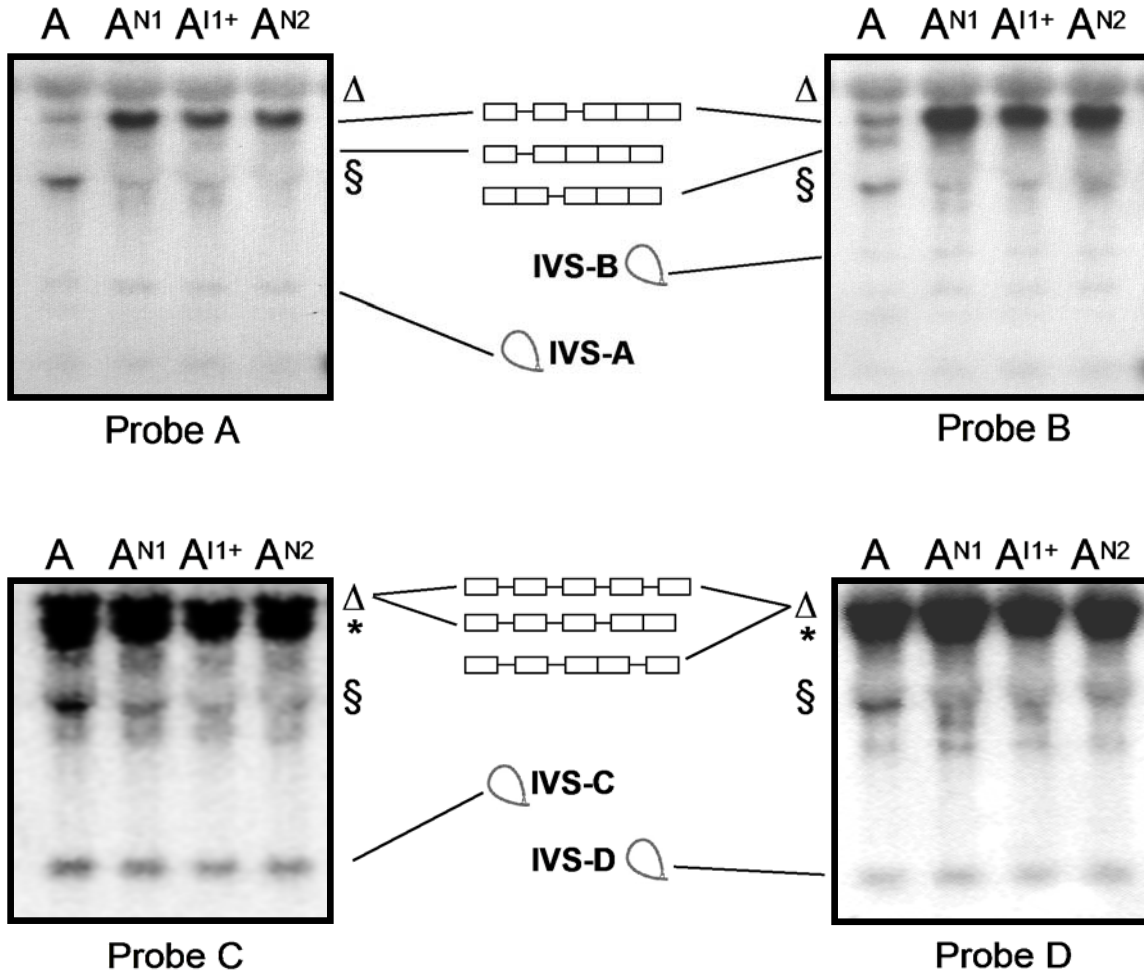

**A**

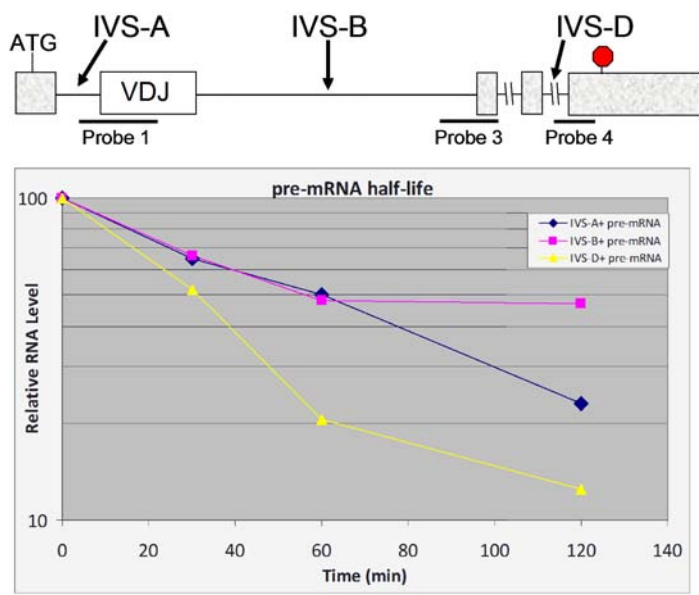

**B**

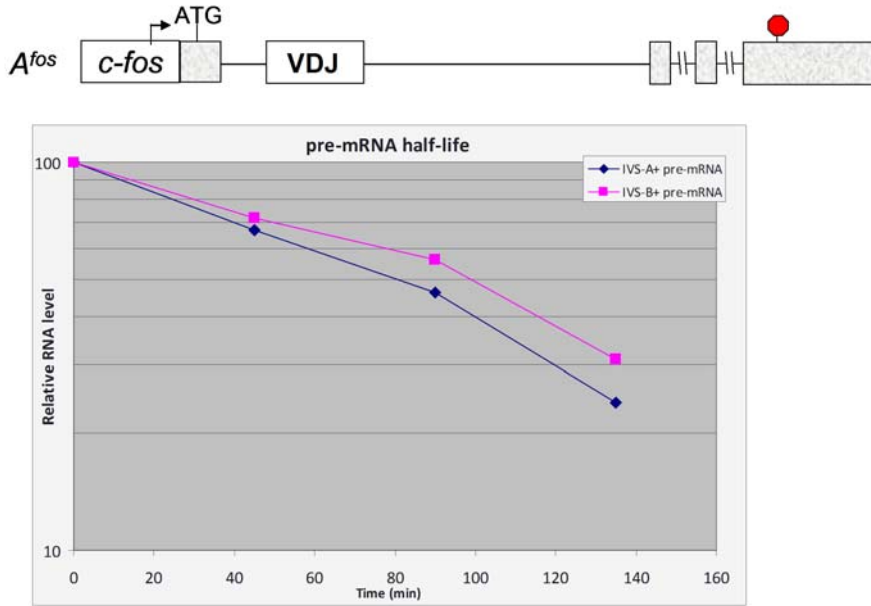

**C**

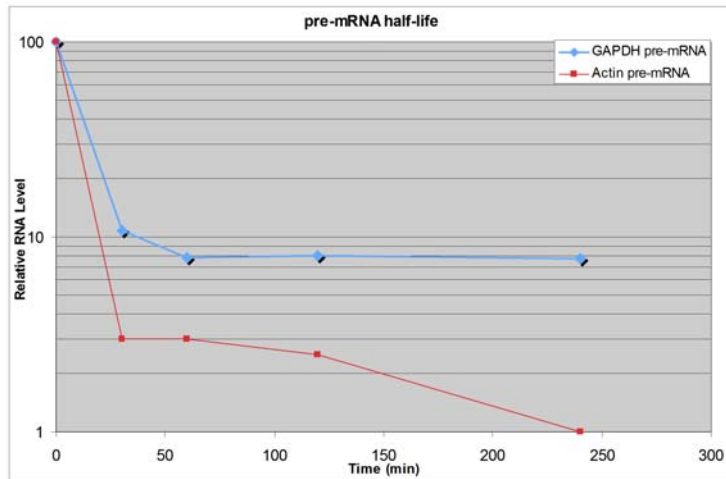

# Supplementary Figure S4

**A**

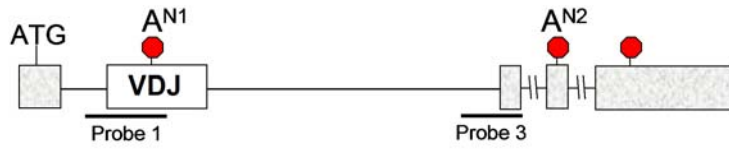

**B**

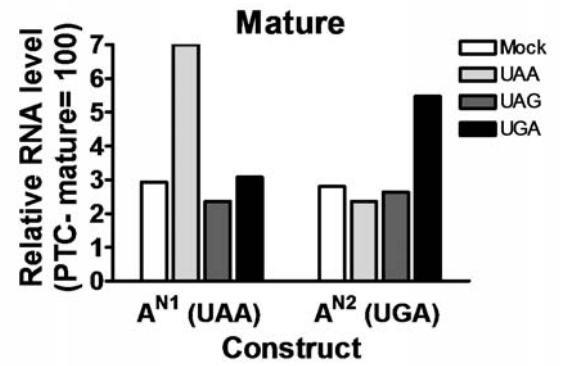

**C**

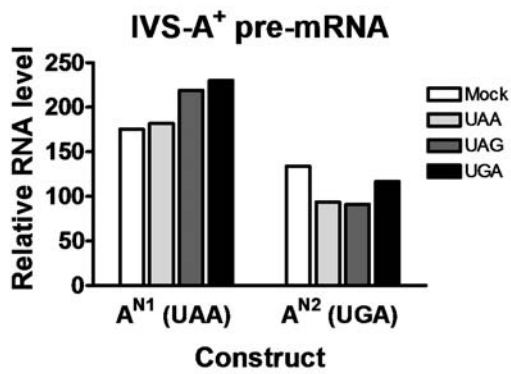

**D**

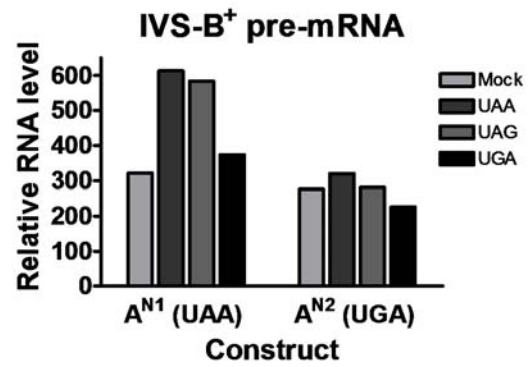

**Table S1. Constructs**

| Construct               | Name   | Mutation                             | Primer (5'-3')                                                                                                  |
|-------------------------|--------|--------------------------------------|-----------------------------------------------------------------------------------------------------------------|
| <b>A</b>                | β-652  | none                                 | Gudikote <i>et al.</i> 2002 (8)                                                                                 |
| <b>A<sup>N1</sup></b>   | β-653  | Codon 91, nonsense                   | Gudikote <i>et al.</i> 2002 (8)                                                                                 |
| <b>A<sup>M1</sup></b>   | β-1149 | Codon 91, missense                   | MDA 1924: CTGATCCATTACTCATACGTCGCTGACAGCACGGAG<br>MDA 1925: CTCCGTGCTGTCAGCGACGTATGAGTAATGGATCAG                |
| <b>A<sup>I1+</sup></b>  | β-725  | VDJ exon frameshift +10 at Codon 100 | Gudikote <i>et al.</i> 2002 (8)                                                                                 |
| <b>A<sup>N2</sup></b>   | β-726  | Codon 194 exon 6 nonsense            | MDA 2908: CACGAGAAGCTCTGAGGATGGCTG<br>MDA 2909: CAGCCATCCTCAGAGCTTCTCGTG                                        |
| <b>A<sup>M2</sup></b>   | β-1076 | Codon 194 exon 6 missense            | MDA 1834: GAAGTACACGAGAAGCTCGGAGGATGGCTGAAGTCCAAC<br>MDA 1835: GTTGGACTTCAGCCATCCTCCGAGCTTCTCGTGTACTTC          |
| <b>A<sup>N3</sup></b>   | β-1075 | Codon 112 VDJ nonsense               | MDA 1830: CAAGGCCTCCAGACCAAGCDAAGAGAATTTCTCTCTCATTCTG<br>MDA 1831: CAGAATGAGAGAGAAAATTCTCTTHGCTTGGTCTGGAGGCCTTG |
| <b>A<sup>M3</sup></b>   | β-1077 | Codon 112 VDJ missense               | MDA 1926: GGCCTCCAGACCAAGCGAAGAGAATTTCTCTCTCATTCTG<br>MDA 1927: CAGAATGAGAGAGAAAATTCTCTTCGCTTGGTCTGGAGGCC       |
| <b>A<sup>N4</sup></b>   | β-1163 | Codon 146 VDJ nonsense               | MDA 2449: GGTGCAGAAACGCTGTATTTGGCTCAGGAACCAGACTG<br>MDA 2450: CAGTCTGGTTCCTGAGCCAAATTACAGCGTTTCTGCACC           |
| <b>A<sup>M4</sup></b>   | β-1164 | Codon 146 VDJ missense               | MDA 2447: GGTGCAGAAACGCTGTACTTTGGCTCAGGAACCAGACTG<br>MDA 2448: CAGTCTGGTTCCTGAGCCAAAGTACAGCGTTTCTGCACC          |
| <b>A<sup>I2+</sup></b>  | β-1154 | Codon 114 VDJ Frameshift +1          | MDA 1725: CTCCAGAATGAGAGAGAAAATTTCTCTTGGCTTGGTCTGGAG<br>MDA 1726: CTCCAGAATGAGAGAGAAAATTTCTCTTGGCTTGGCTTGGAG    |
| <b>A<sup>I3</sup></b>   | β-1080 | Codon 114 VDJ Frameshift +3          | MDA 1733: CTCCAGACCAAGCCAAGAGAAAAATTTCTCTCTCATTCTGGAG<br>MDA 1734: CTCCAGAATGAGAGAGAAAATTTTCTCTTGGCTTGGTCTGGAG  |
| <b>A<sup>D1+</sup></b>  | β-1155 | Codon 146 VDJ Frameshift -1          | MDA 1735: GGTGCAGAAACGCTGTATTTGGCTCAGGAACCAGACTG<br>MDA 1736: CAGTCTGGTTCCTGAGCCAAATACAGCGTTTCTGCAAA            |
| <b>A<sup>I2D1</sup></b> | β-1156 | Codon 114,146 VDJ Frameshift +1/-1   |                                                                                                                 |
| <b>A<sup>N5</sup></b>   | β-1161 | Codon 164 E5 nonsense                | MDA 2308: GACTGGAGCTAGGTCGTCCTG<br>MDA 2309: CAGGACGACCTAGCTCCAGTC                                              |
| <b>A<sup>M5</sup></b>   | β-1162 | Codon 164 E5 missense                | MDA 2310: GACTGGAGCGAGGTCGTCCTG<br>MDA 2311: CAGGACGACCTCGCTCCAGTC                                              |
| <b>ΔA</b>               | β-1177 | Codon 194 IVS 5,6 PTC-               |                                                                                                                 |
| <b>ΔA<sup>N2</sup></b>  | β-1178 | Codon 194 ΔIVS 5,6 nonsense          | MDA 476: GGTTGGATCCCTCACATGGGTGGTTCA<br>MDA 480: GACAATCGATGCTTGGGGCCTATGACT                                    |
| <b>ΔA<sup>M2</sup></b>  | β-1179 | Codon 194 ΔIVS 5,6 missense          |                                                                                                                 |
| <b>A<sup>N6</sup></b>   | β-1184 | Codon 191 E6 nonsense                | MDA 2866: GGAAGTACACTAGAAGCTCCGAG<br>MDA 2867: CTCGGAGCTTCTAGTGTACTTCC                                          |
| <b>A<sup>M6</sup></b>   | β-1185 | Codon 191 E6 missense 1              | MDA 2868: GGAAGTACACMAGAAGCTCCGAG<br>MDA 2869: CTCGGAGCTTCTKGTGTACTTCC                                          |
| <b>A<sup>M6'</sup></b>  | β-1186 | Codon 191 E6 missense 2              | Same as A <sup>M6</sup>                                                                                         |
| <b>A<sup>N7</sup></b>   | β-1187 | Codon 192 E6 nonsense                | MDA 2870: GAAGTACACGAGTAGCTCCGAGG                                                                               |

|                        |        |                            |                                                                        |
|------------------------|--------|----------------------------|------------------------------------------------------------------------|
|                        |        |                            | MDA 2871: CCTCGGAGCTACTCGTGTACTTC                                      |
| <b>A<sup>M7</sup></b>  | β-1188 | Codon 192 E6 missense 1    | MDA 2872: GAAGTACACGAGMAGCTCCGAGG<br>MDA 2873: CCTCGGAGCTKCTCGTGTACTTC |
| <b>A<sup>M7'</sup></b> | β-1189 | Codon 192 E6 missense 2    | Same as A <sup>M7</sup>                                                |
| <b>A<sup>N8</sup></b>  | β-1190 | Codon 195 E6 nonsense      | MDA 2874: GAAGCTCCGATGATGGCTGAAG<br>MDA 2875: CTTCAGCCATCATCGGAGCTTC   |
| <b>A<sup>M8</sup></b>  | β-1191 | Codon 195 E6 missense 1    | MDA 2876: GAAGCTCCGAMGATGGCTGAAG<br>MDA 2877: CTTCAGCCATCKTCGGAGCTTC   |
| <b>A<sup>M8'</sup></b> | β-1192 | Codon 195 E6 missense 2    | Same as A <sup>M8</sup>                                                |
| <b>A<sup>D2+</sup></b> | β-1193 | Codon 190 E6 frameshift -1 | MDA 2878: CCCAGGAAGTAACGAGAAGCTC<br>MDA 2879: GAGCTTCTCGTTACTTCCTGGG   |



**Table S2. RNase protection analysis probes**

| Probe | Target             | Primers (5'-3') or Source                                        |
|-------|--------------------|------------------------------------------------------------------|
| 1     | IVS-A and VDJ exon | Probe <i>b</i> in Gudikote <i>et al.</i> 2005 (10)               |
| 2     | Exon 1 and IVS-A   | MDA 1446: GAAGCAGAGTCTGGGGGAGC<br>MDA 1447: CTCCTAACCCCGTCGCCT   |
| 3     | IVS-B and exon 5   | MDA 1448: GTACTTCGGTCCCGGCAC<br>MDA 1449: GTACCAATGGCCACACAG     |
| 4     | IVS-D and exon 7   | MDA 2016: GGGCAGACTCATCCCATT<br>MDA 2189: GTTTGGCATTGATGATGTCCAC |

**Table S3. Northern blot analysis probes**

| Probe | Target   | Primers (5'-3') or Source                                                        |
|-------|----------|----------------------------------------------------------------------------------|
| A     | IVS-A    | Generated by restriction enzyme digestion as detailed in the Materials & Methods |
| B     | IVS-B    | Generated by restriction enzyme digestion as detailed in the Materials & Methods |
| C     | IVS-C    | MDA 1629: GTAACCGGGCCCAGGAG<br>MDA 1630: CTCCTGGGCCTAGAACAAG                     |
| D     | IVS-D    | MDA 1631: GTGAGTGGCTTTGGTTCCCG<br>MDA 1632: CTGGGAAGGGAGCAGAACAAG                |
| E     | VDJ exon | VDJ exon probe from Gudikote <i>et al.</i> 2002 (8)                              |
